# Supplementary material
Source: publisher figshare collection journal article supplement (https://acs.figshare.com/ndownloader/files/26366615)
Supplement: Supplementary file 1 [file 26366615]

## Supporting Information

### Fabrication of 1D Te and 2D ReS<sub>2</sub> Mixed-Dimensional van der Waals *p-n*

#### Heterojunction for High-Performance Photodetector

Jia-Jia Tao,<sup>†</sup> Jinbao Jiang,<sup>‡</sup> Shi-Nuan Zhao,<sup>§</sup> Yong Zhang,<sup>‡</sup> Xiao-Xi Li,<sup>†</sup> Xiaosheng Fang,<sup>‡</sup> Peng Wang,<sup>⊥</sup> Weida Hu,<sup>⊥</sup> Young Hee Lee,<sup>\*,‡</sup> Hong-Liang Lu,<sup>\*,†</sup> and David-Wei Zhang<sup>†</sup>

<sup>†</sup>State Key Laboratory of ASIC and System, Shanghai Institute of Intelligent Electronics & Systems, School of Microelectronics, Fudan University, Shanghai 200433, China

<sup>‡</sup>Center for Integrated Nanostructure Physics (CINAP), Institute for Basic Science (IBS), Department of Energy Science, Department of Physics, Sungkyunkwan University, Suwon 16419, Republic of Korea

<sup>§</sup>Collaborative Innovation Center of Advanced Microstructures, State Key Laboratory of Applied Surface Physics, Department of Physics, Fudan University, Shanghai 200433, China

<sup>‡</sup>Department of Materials Science, Fudan University, Shanghai 200433, China

<sup>⊥</sup>State Key Laboratory of Infrared Physics, Shanghai Institute of Technical Physics Chinese Academy of Sciences, Shanghai 200083, China

E-mail: leeyoung@skku.edu (Y. H. Lee), honglianglu@fudan.edu.cn (H-L Lu)

## Experimental Methods

### *Photodetector Device Fabrication.*

The Te NWs were separated using high-speed centrifugation and then was rinsed with absolute alcohol and acetone three times. Then, these nanowires were dispersed in alcohol for the next step of composition. The Te NWs, which are dispersed in ethanol, are dropped onto SiO<sub>2</sub>/p<sup>+</sup>-Si substrate and then dried naturally. Then the ReS<sub>2</sub> NFs were mechanically exfoliated from the bulk crystals (the bulk ReS<sub>2</sub> was commercially available from Six Carbon Technology Supplies) onto the SiO<sub>2</sub>/p<sup>+</sup>-Si substrate by using the “Scotch-tape” method. The ReS<sub>2</sub> NFs with 7.9 nm thickness and proper lateral size were selected for device fabrication. Then, a dry-transfer technique was employed to fabricate the Te/ReS<sub>2</sub> heterojunction onto SiO<sub>2</sub>/p<sup>+</sup>-Si substrate. In detail, the Te NWs transfer processes were carried out using a polydimethylsiloxane (PDMS) coated propylene carbonate (PPC). When heated to 60 °C, the PDMS and PCC will separate, the Te NWs will adhere to the PCC. Then, the PPC coated Te NWs was transfer onto the ReS<sub>2</sub> NFs. After the transfer, the PPC was eliminated by acetone and cleaned by isopropanol. We made the patterns of source and drain by standard electron beam lithography. A layer of 10/70 nm Cr/Au was then deposited by sputtering. Finally, the lift-off process was taken for the metal contacts.

### *Density Functional Theory (DFT) Calculations.*

First, for ReS<sub>2</sub>, we constructed a  $2 \times 2$  supercell containing 4 Re and 8 S atoms to calculate the band structure of pristine ReS<sub>2</sub>. A vacuum layer of 15 Å is placed above the monolayer to avoid the interaction between the adjacent layers, and a cut off energy of 500 eV and a precise  $9 \times 9 \times 1$  k-point sampling grid are used. All of the atoms in the supercell are allowed to relax until residual forces have converged to less than  $2.0 \times 10^{-3}$  eV/Å and the total energy to less than  $1.0 \times 10^{-4}$  eV during the structural optimization.<sup>1</sup> Then, for the properties of Te, the Heyd - Scuserian - Ernzerhorf (HSE06) hybrid functional<sup>2</sup> was used in order to obtain an accurate band gap in monolayer (1 L) and bulk Te because this functional is computational and machine demanding. The cut off energy plane-wave basis was set to be 500 eV. The

vacuum space vertically along the  $z$ -direction was set to over 16 Å in to mimic the 2D system and to avoid the interaction between layers and its periodic images. During optimization and single point calculations, vdW interaction is considered in PBE exchange functional proposed by Grimme (DFT-D2)<sup>2</sup> to account for the inter-layers' interaction in few-layer Te (layer number ( $L$ ) > 1). The atomic positions were fully relaxed until the forces on all atoms were less than  $10^{-2}$  eV/Å. The energy convergence criterion was set to be  $10^{-6}$  eV/cell using the Fast (Davison and RMM-DIIS) algorithm. A dense  $k$ -mesh of  $15 \times 15 \times 1$  sampling with the Monkhorse-Pack scheme<sup>4</sup> was used for both optimization and single point calculation in the Brillouin zone integration.

## REFERENCES

- (1) Qin, J. K.; Shao, W. Z.; Xu, C. Y.; Li, Y.; Ren, D. D.; Song, X. G.; Zhen, L.; Chemical Vapor Deposition Growth of Degenerate  $p$ -Type Mo-Doped ReS<sub>2</sub> Films and Their Homojunction. *ACS Appl. Mater. Interfaces* **2017**, *9*, 15583-15591.
- (2) Heyd, J.; Scuseria, G.E. Assessment and validation of a screened Coulomb hybrid density functional. *J. Chem. Phys.* **2004**, *120*, 7274-7280.
- (3) Perdew, J.P.; Burke, K.; Ernzerhof, M. Generalized gradient approximation made simple. *Phys. Rev. Lett.* **1997**, *78*, 1396.
- (4) Monkhorst, H.J.; Pack, J.D. Special points for brillouin-zone integrations. *Phys. Rev. B* **1976**, *13*, 5188-5192.

**Fig. S1** Schematic for the fabrication process of Te, ReS<sub>2</sub>, and Te/ReS<sub>2</sub> FET based phototransistors.

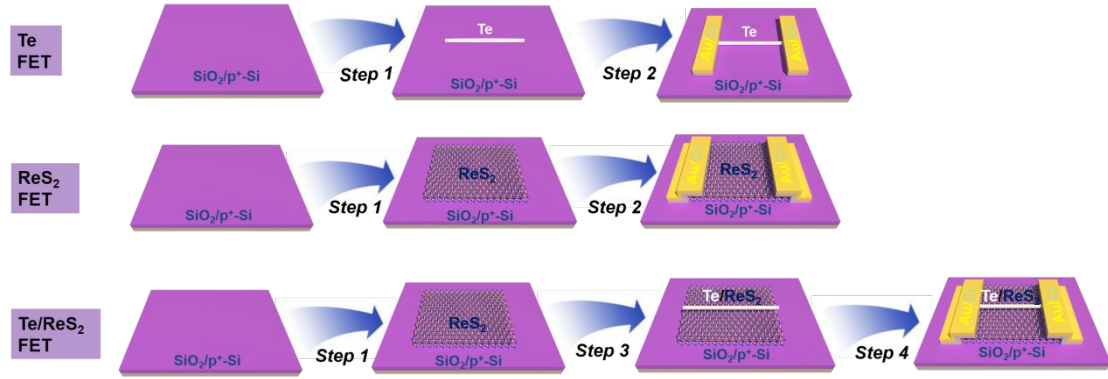

**Fig. S2** The SEM and optical microscope images of (a) ReS<sub>2</sub> and (b) Te/ReS<sub>2</sub> mixed dimensional heterjunction devices.

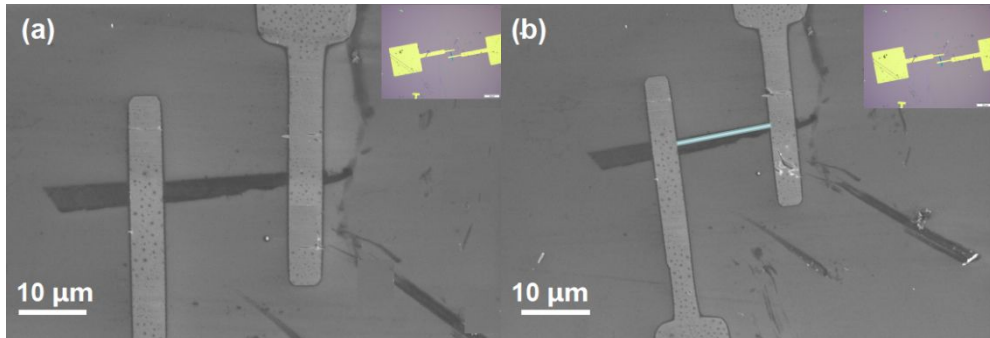

**Fig. S3** The  $I_{ds}$ - $V_d$  curves at  $V_g$  of 0 V of (a) Te, (b) ReS<sub>2</sub>, and (c) Te/ReS<sub>2</sub> devices.

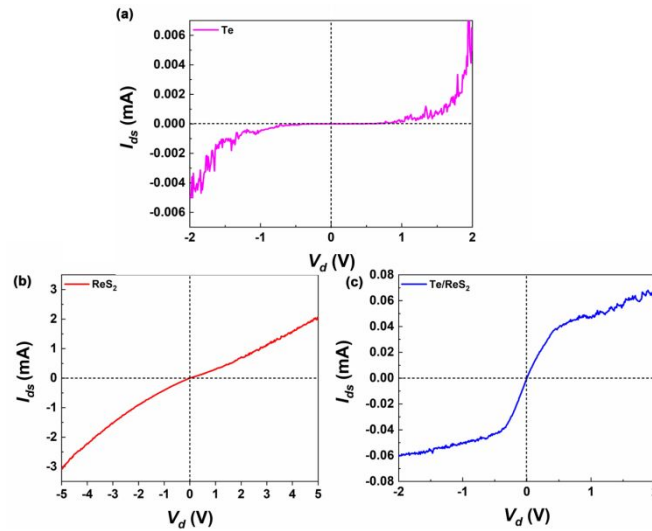

**Fig. S4** Transfer curve of Te FET measured under dark at  $V_{ds} = 1$  V.

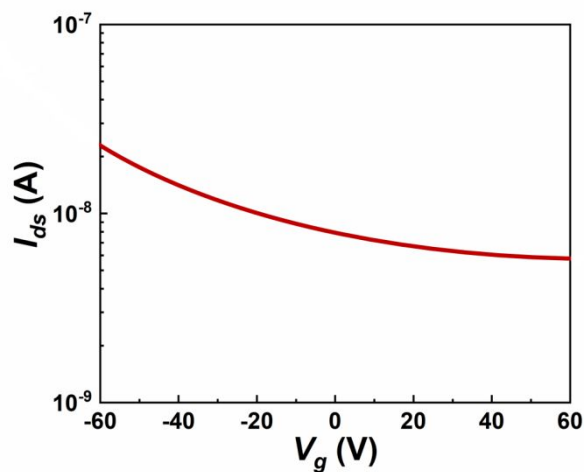

The transfer characteristic of Te is demonstrated in Fig. S4 and a conspicuous *p*-type behavior was observed under dark. The Te-based FET showed poor performance with low on/off ratio of about 10.

**Fig. S5** The  $V_g$ - $I_{ds}$  characteristics of (a) ReS<sub>2</sub> and (b) Te/ReS<sub>2</sub> devices at different light intensity with the wavelength of 632 nm.

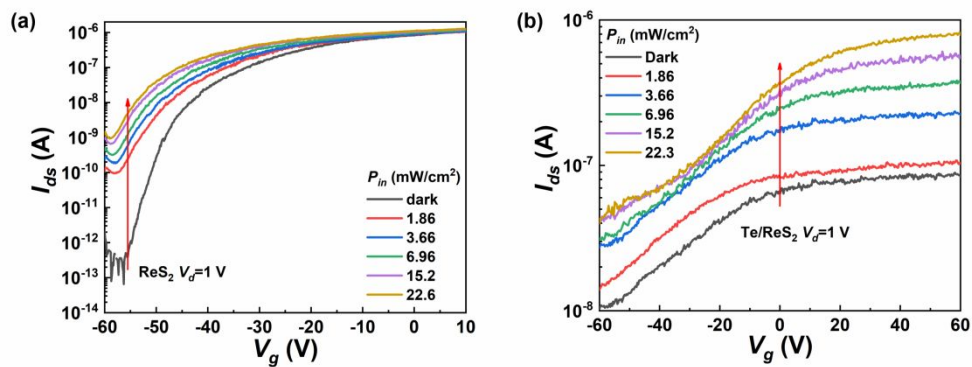

**Fig. S6** The  $I_d$ - $V_d$  of pure Te device under dark conditions and at maximum light intensity of 22.6 mW/cm<sup>2</sup> with the wavelength of 632 nm.

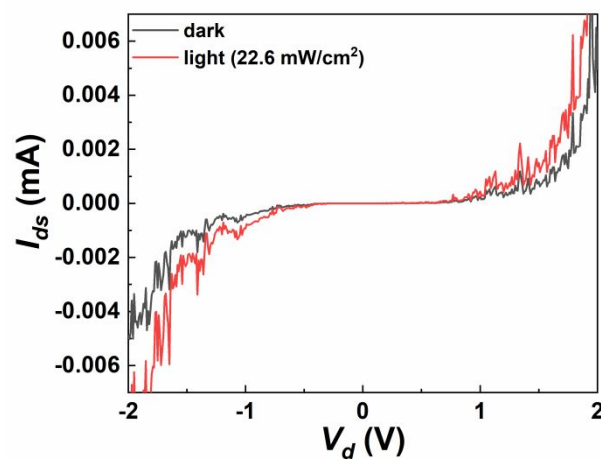

Fig. S6 depicts optoelectronic properties of Te NWs device, exhibiting non-obvious response under 22.6 mW·cm<sup>-2</sup> illumination.
